# Supplementary material for: Green Strategies for the Preparation of Enantiomeric 5–8-Membered Carbocyclic β-Amino Acid Derivatives through CALB-Catalyzed Hydrolysis
Source: MDPI journal article supplement (doi:10.3390/molecules27082600), 2022-04-18

# Green Strategies for the Preparation of Enantiomeric 5–8-Membered Carbocyclic $\beta$ -Amino Acid Derivatives through CALB-Catalyzed Hydrolysis

Sayeh Shahmohammadi <sup>1,2</sup>, Tünde Faragó <sup>1</sup>, Márta Palkó <sup>1</sup> and Enikő Forró <sup>1,\*</sup>

<sup>1</sup> Institute of Pharmaceutical Chemistry, Interdisciplinary Excellence Center, Faculty of Pharmacy, University of Szeged, H-6720 Szeged, Hungary; sayeh.s@pharm.u-szeged.hu (S.S.); farago.tunde@pharm.u-szeged.hu (T.F.); palko.marta@szte.hu (M.P.)

<sup>2</sup> MTA-SZTE Stereochemistry Research Group, Hungarian Academy of Sciences, H-6720 Szeged, Hungary

\* Correspondence: forro.eniko@szte.hu; Tel.: +36-62-544964

## Contents

|                                                                                                                                                             |    |
|-------------------------------------------------------------------------------------------------------------------------------------------------------------|----|
| 1. <sup>1</sup> H- and <sup>13</sup> CNMR spectra of ester enantiomers (1 <i>R</i> ,2 <i>S</i> )- <b>7-9</b> and (1 <i>R</i> ,2 <i>S</i> )- <b>13</b> ..... | 2  |
| 2. <sup>1</sup> H- and <sup>13</sup> CNMR spectra of amino acid enantiomers (1 <i>S</i> ,2 <i>R</i> )- <b>14-17</b> .....                                   | 6  |
| 3. GC Chromatograms of esters <b>7-9</b> and <b>13</b> :.....                                                                                               | 10 |
| 4. GC Chromatograms of amino acids <b>14-17</b> : .....                                                                                                     | 12 |
| 5. HRMS (ESI) spectra of ester enantiomers (1 <i>R</i> ,2 <i>S</i> )- <b>7-9</b> and (1 <i>R</i> ,2 <i>S</i> )- <b>13</b> .....                             | 14 |
| 6. HRMS (ESI) spectra of amino acid enantiomers (1 <i>S</i> ,2 <i>R</i> )- <b>14-17</b> .....                                                               | 18 |

# 1. $^1\text{H}$ - and $^{13}\text{C}$ -NMR spectra of ester enantiomers (1*R*,2*S*)-7-9 and (1*R*,2*S*)-13

Ethyl (1*R*,2*S*)-2-aminocyclopentanecarboxylate (**7**)

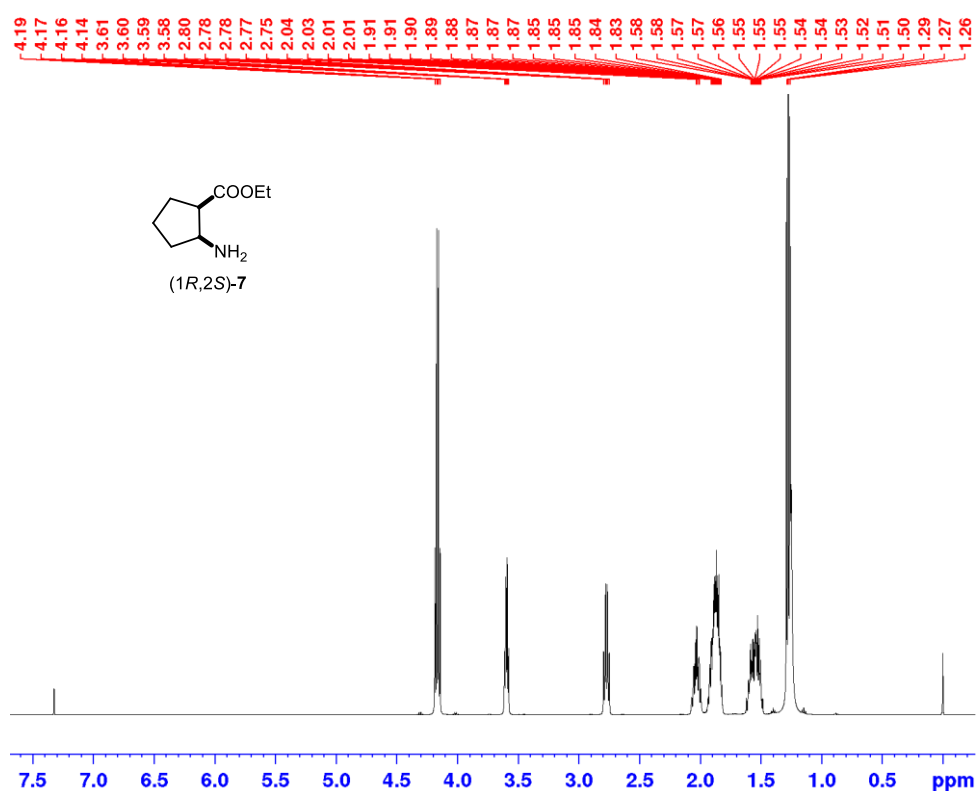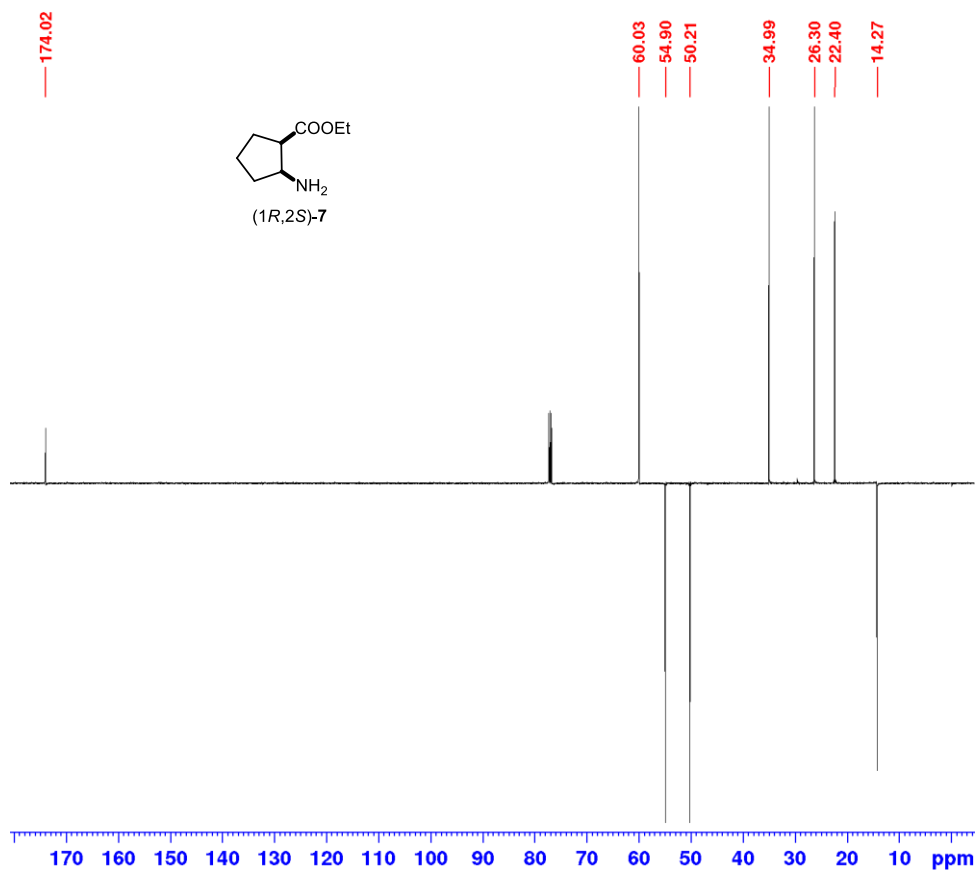

Ethyl (1*R*,2*S*)-2-aminocyclohexanecarboxylate (**8**)

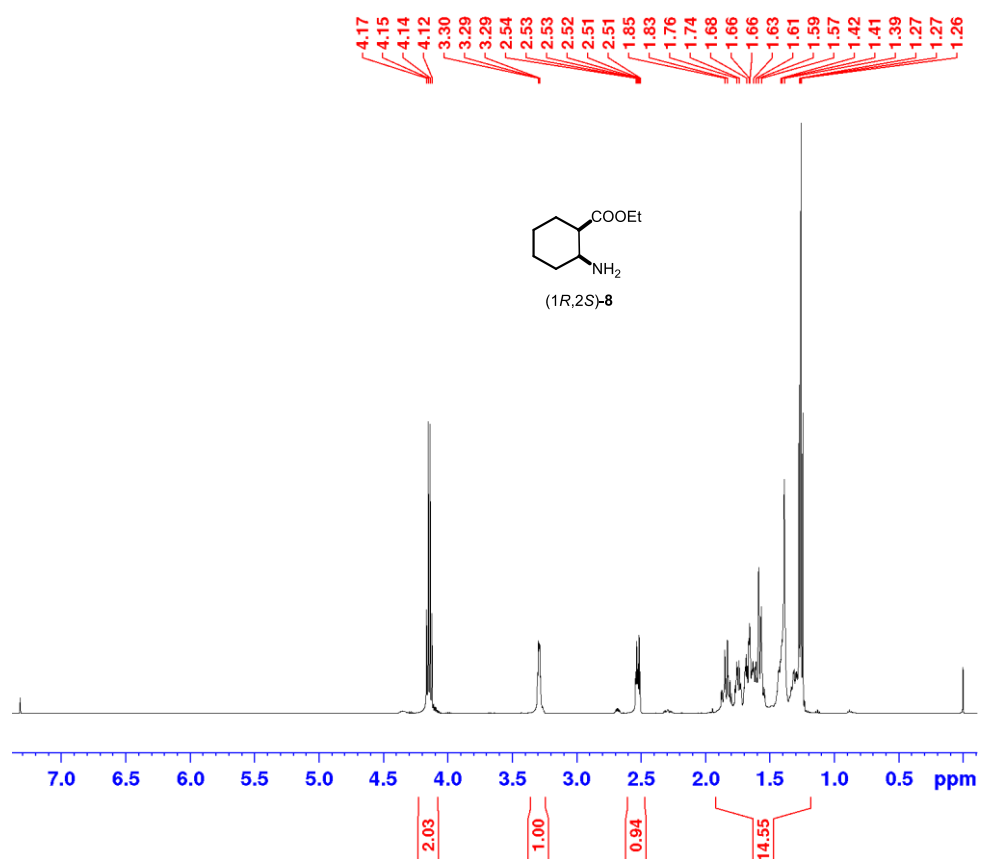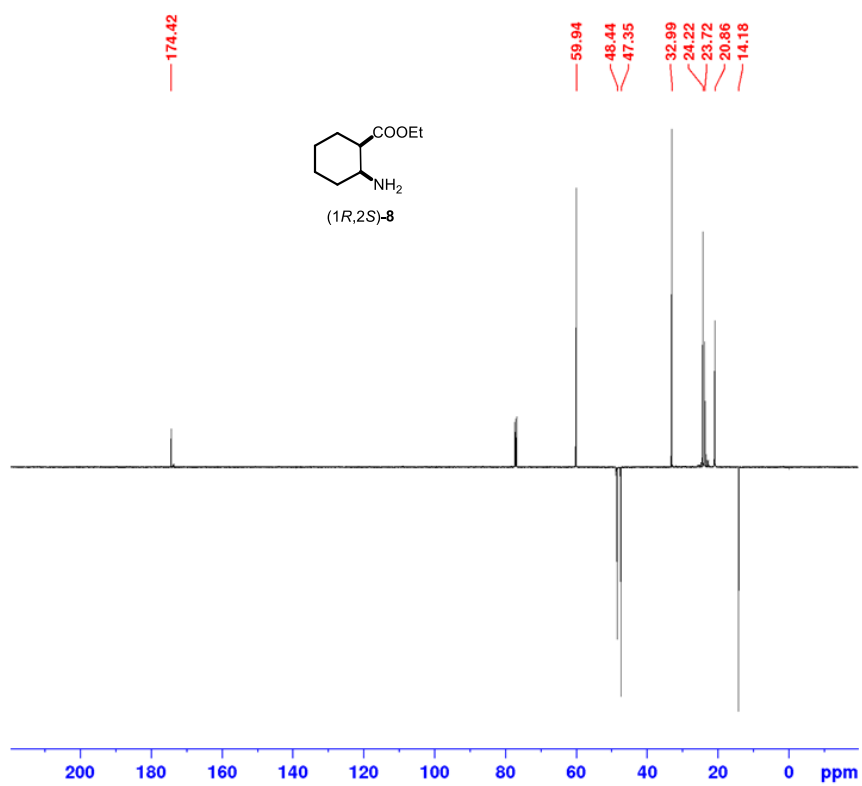

Ethyl (1*R*,2*S*)-2-aminocycloheptanecarboxylate (**9**)

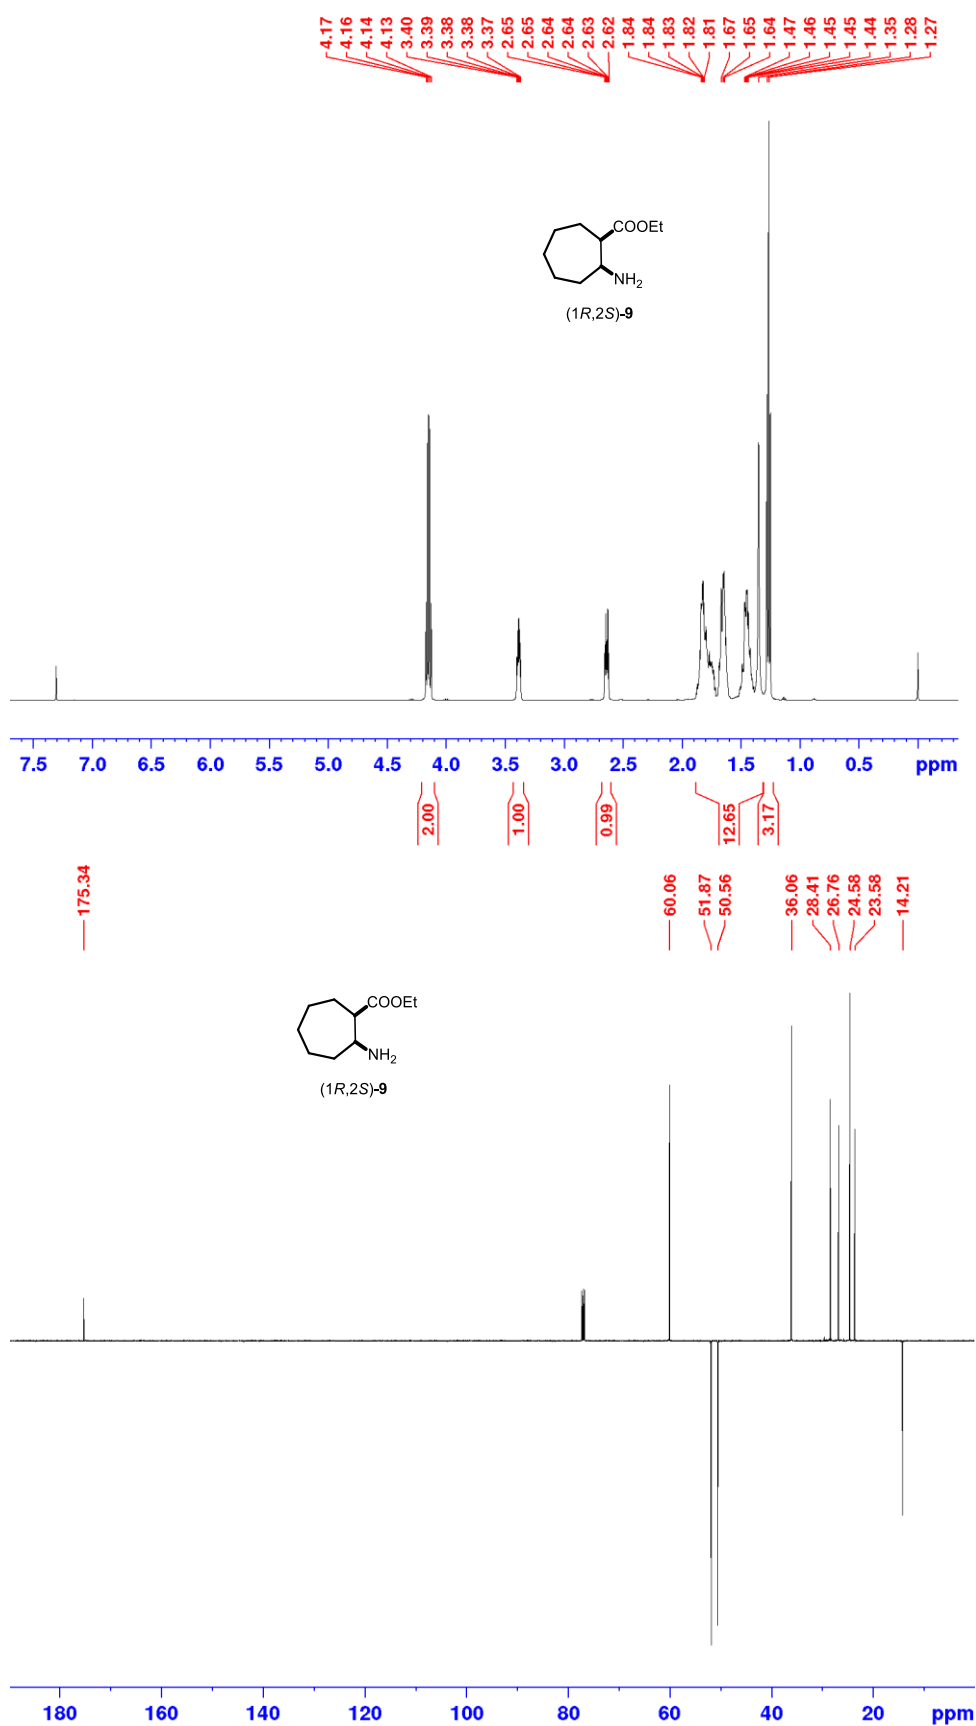

# Ethyl (1*R*,2*S*)-2-aminocyclooctanecarboxylate (**13**)

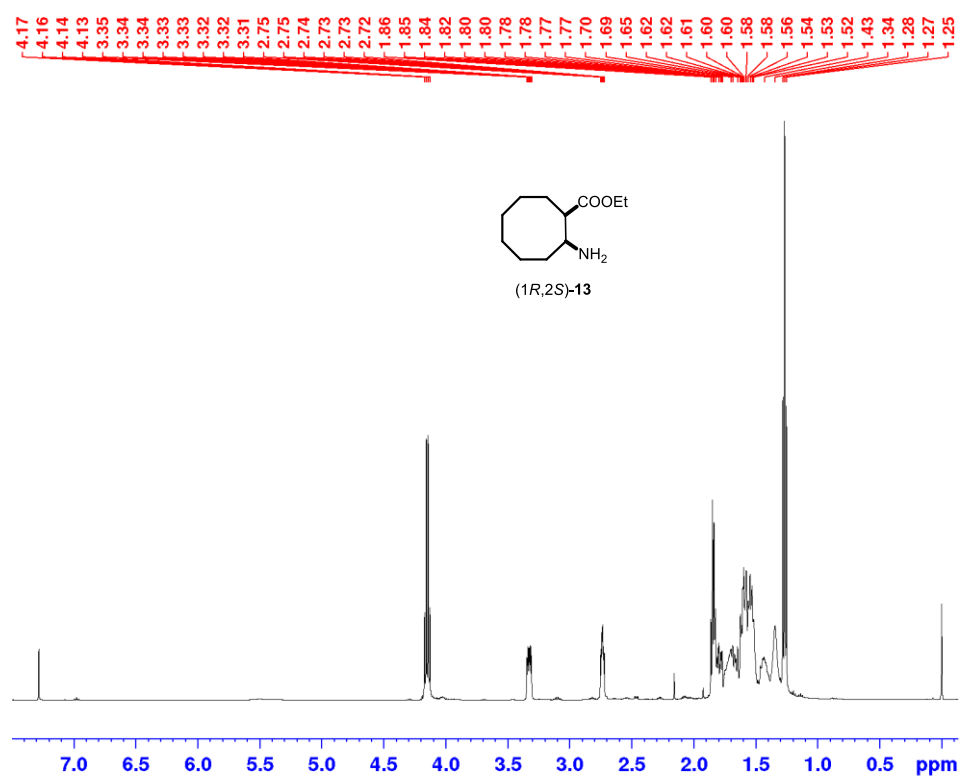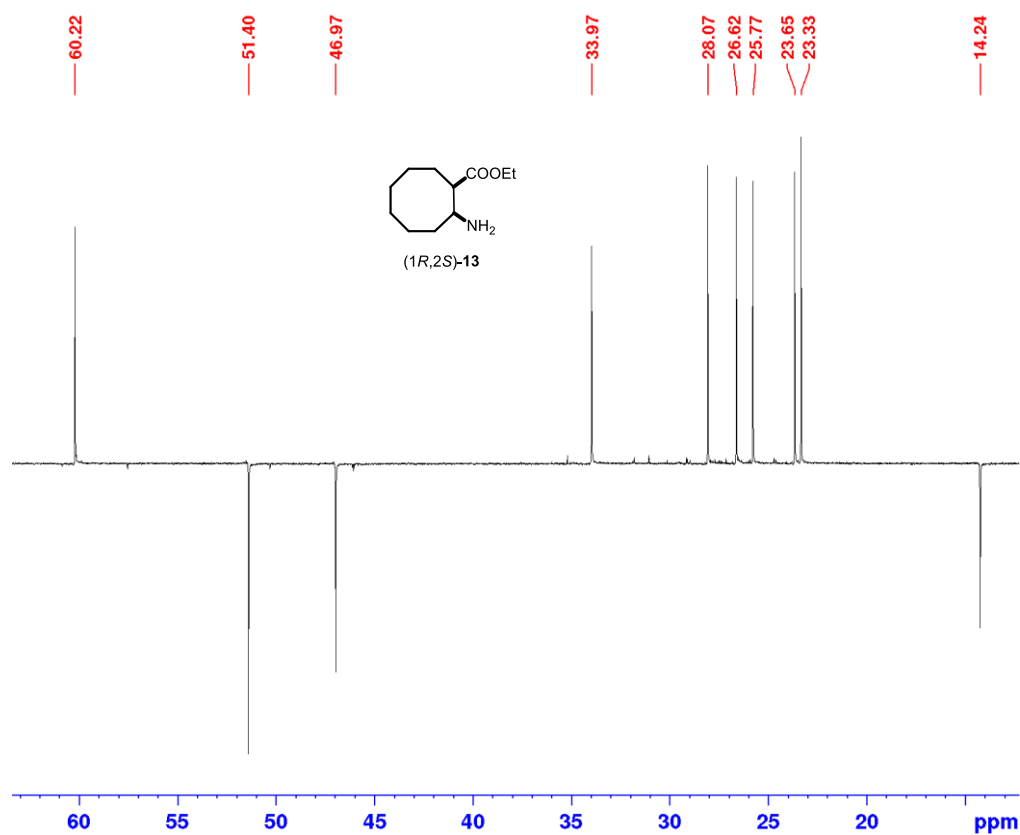

## 2. $^1\text{H}$ - and $^{13}\text{C}$ -NMR spectra of amino acid enantiomers (1*S*,2*R*)-14-17

(1*S*,2*R*)-2-aminocyclopentanecarboxylic acid (**14**)

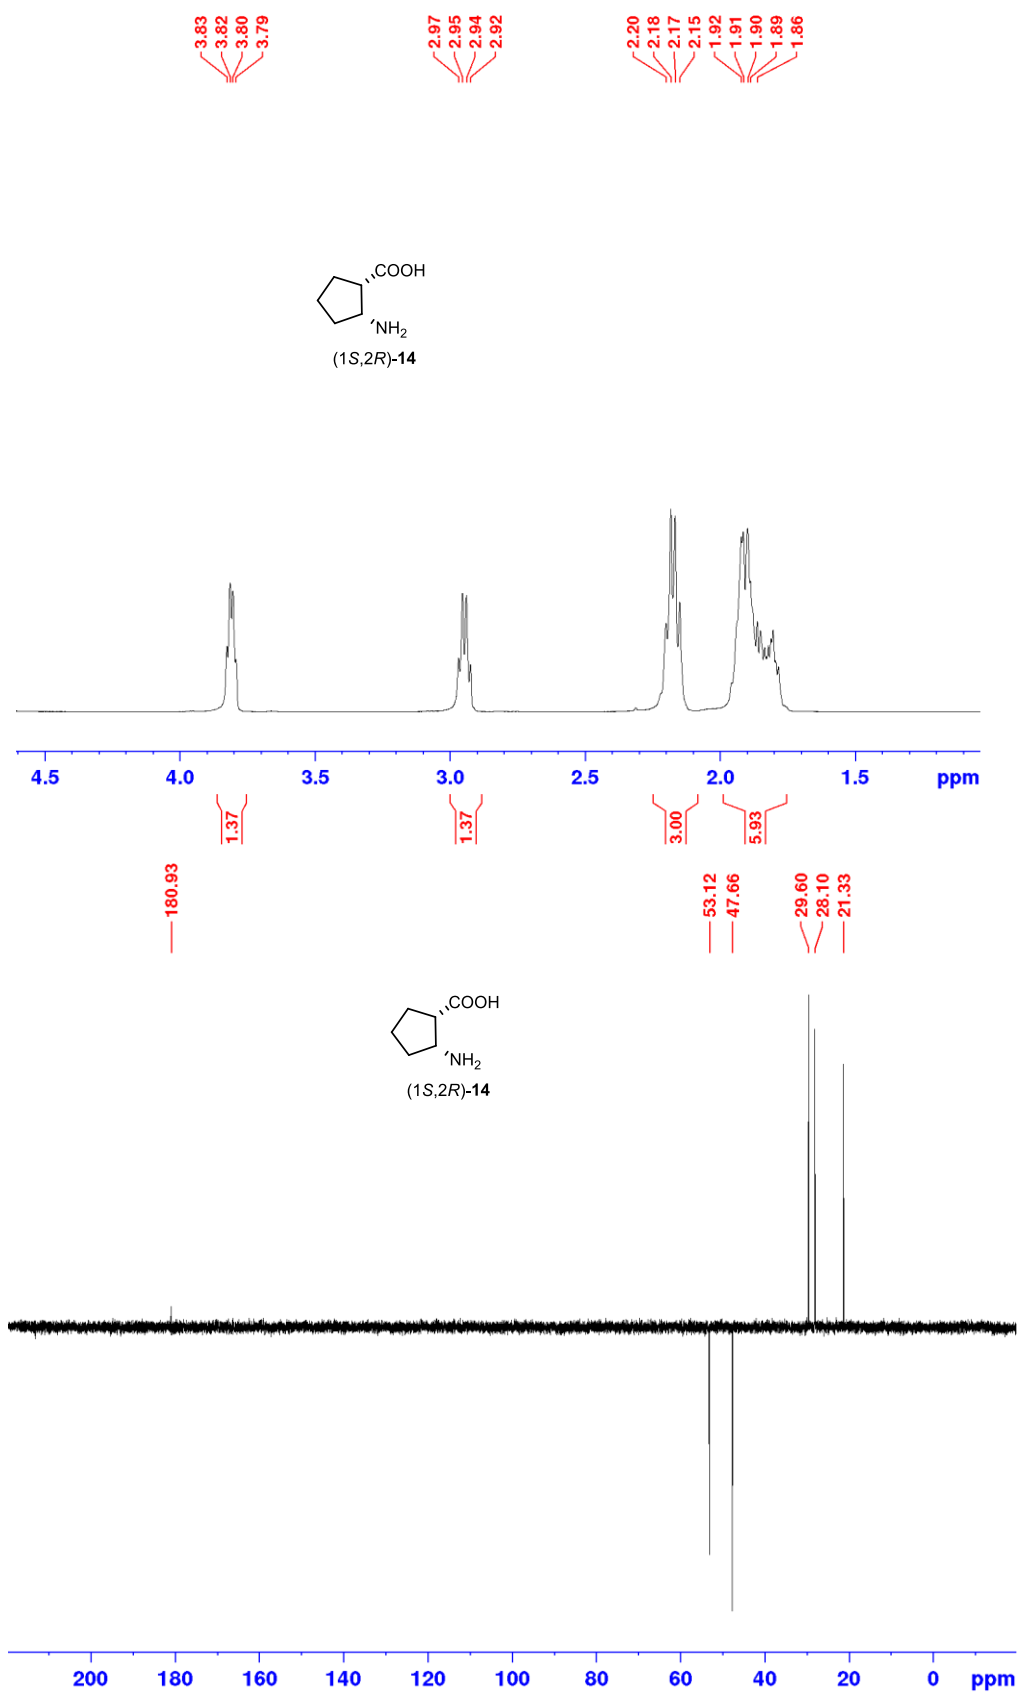

(1*S*,2*R*)-2-aminocyclohexanecarboxylic acid (**15**)

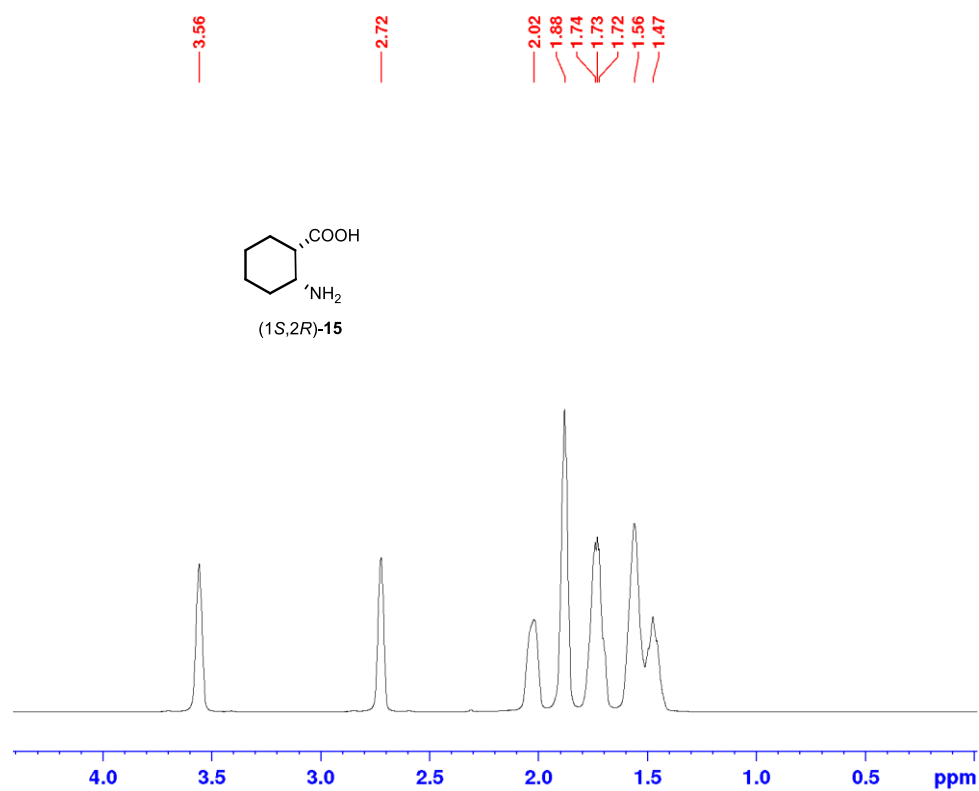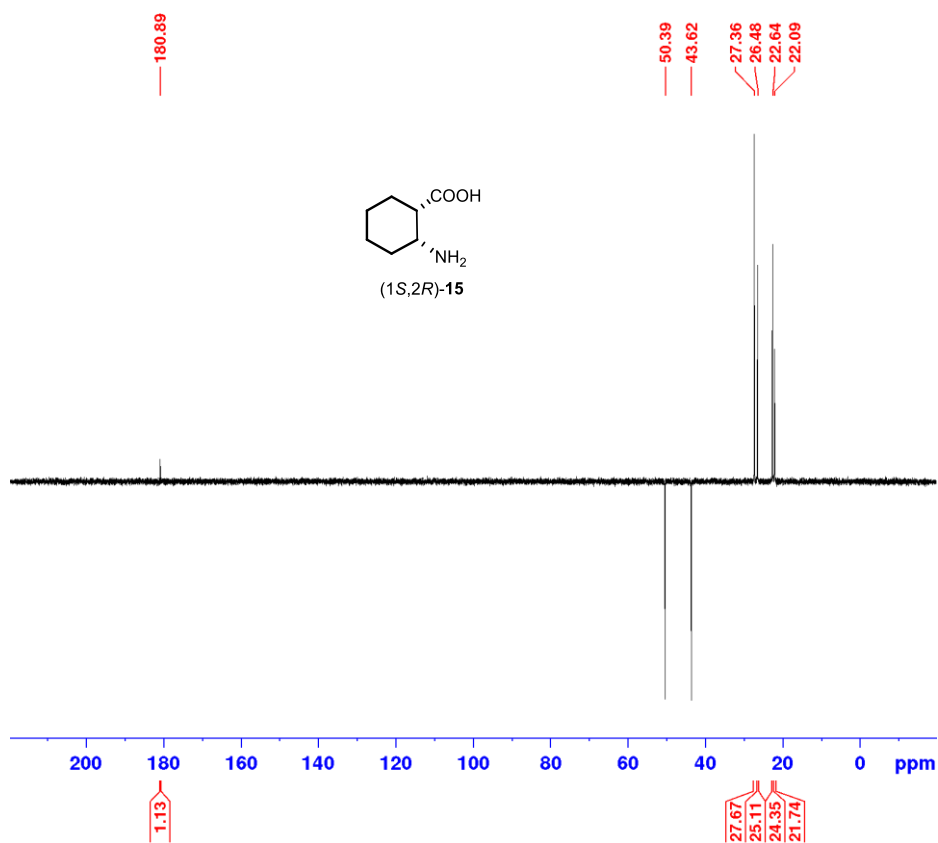

(1*S*,2*R*)-2-aminocycloheptanecarboxylic acid (**16**)

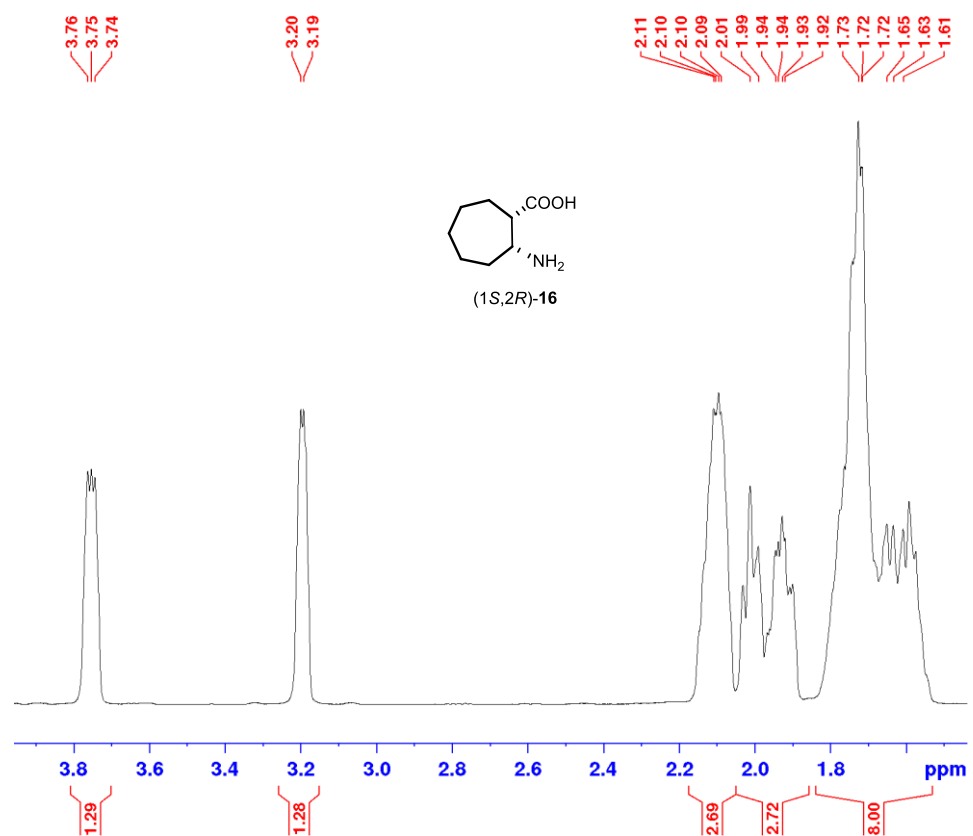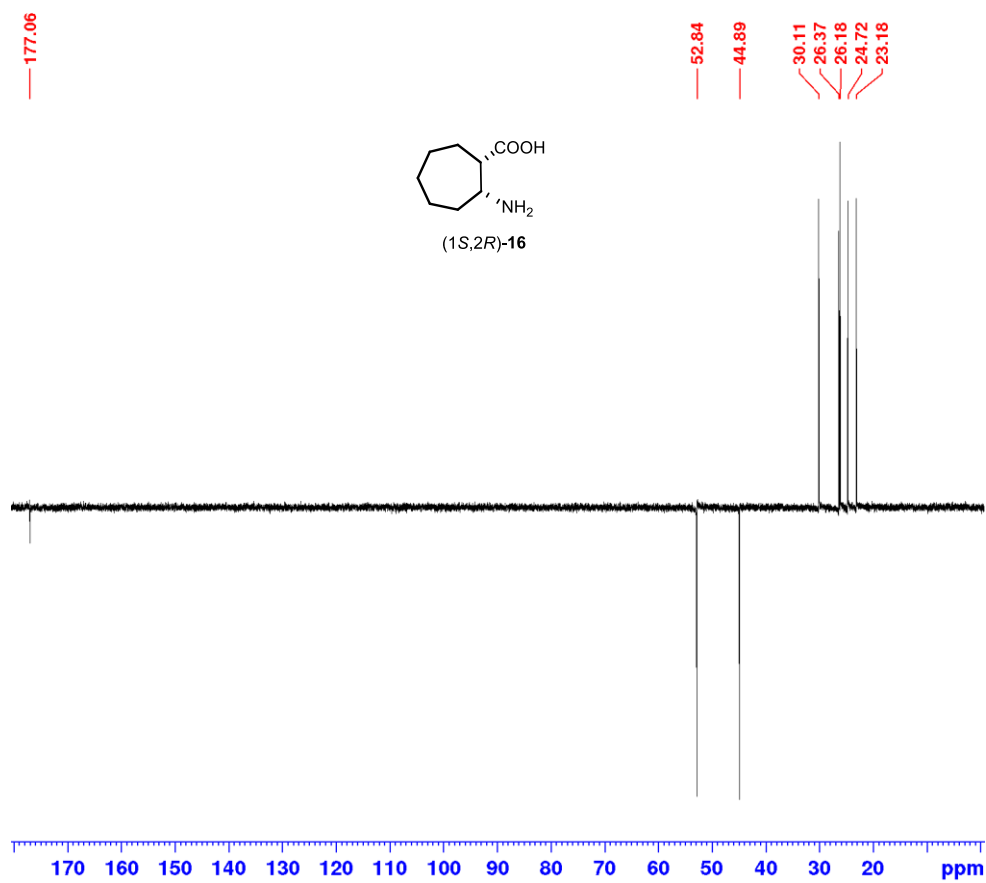



(1*S*,2*R*)-2-aminocyclooctanecarboxylic acid (**17**)

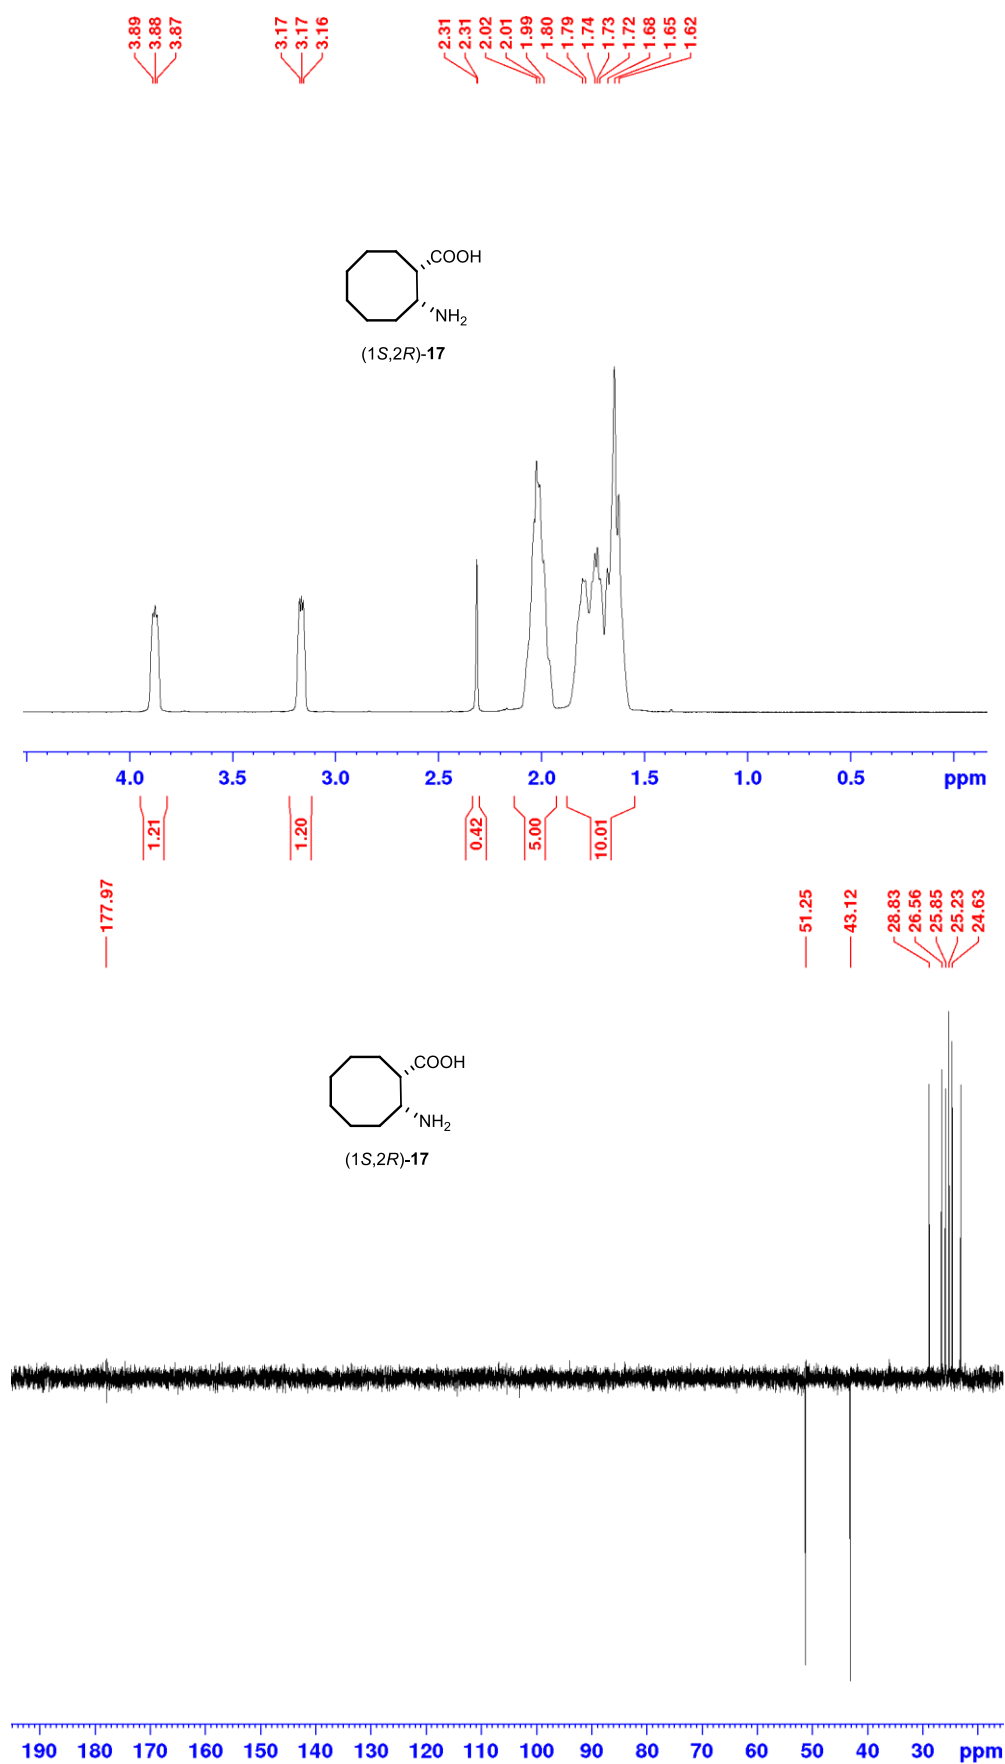

### 3. GC Chromatograms of ester enantiomers 7-9 and 13:

GC Chromatogram of ethyl-2-aminocyclopentanecarboxylate (**7**): retention times (min) for (1*R*,2*S*)-**7**:13.887 (antipode: 14.331): GC equipped with a Chirasil-L-Val column (25m, 0.25mm, 0.12µm), 80 °C for 5 min → 150 °C (temperature rise 15 °C min<sup>-1</sup>), 15 psi

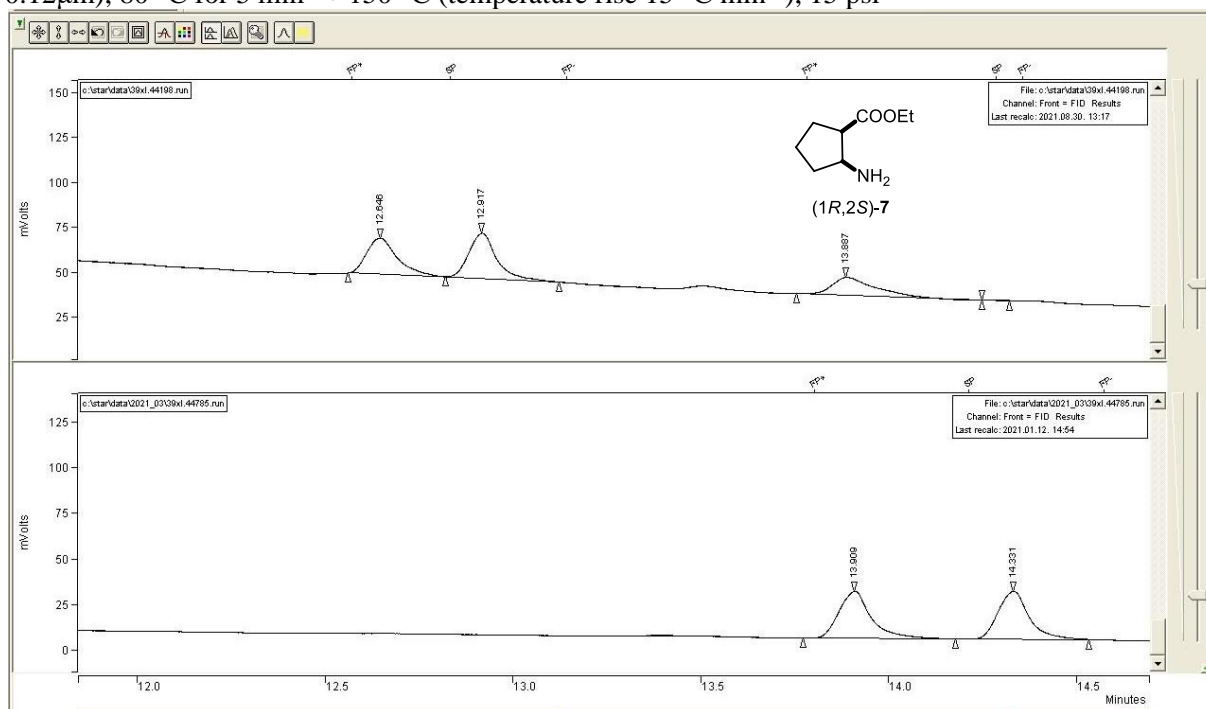

GC Chromatogram of ethyl-2-aminocyclohexanecarboxylate (**8**): retention times (min) for (1*R*,2*S*)-**8**: 16.058 (antipode: 16.316): GC equipped with a Chirasil-L-Val column (25m, 0.25mm, 0.12µm), 80 °C for 5 min → 150 °C (temperature rise 15 °C min<sup>-1</sup>), 15 psi

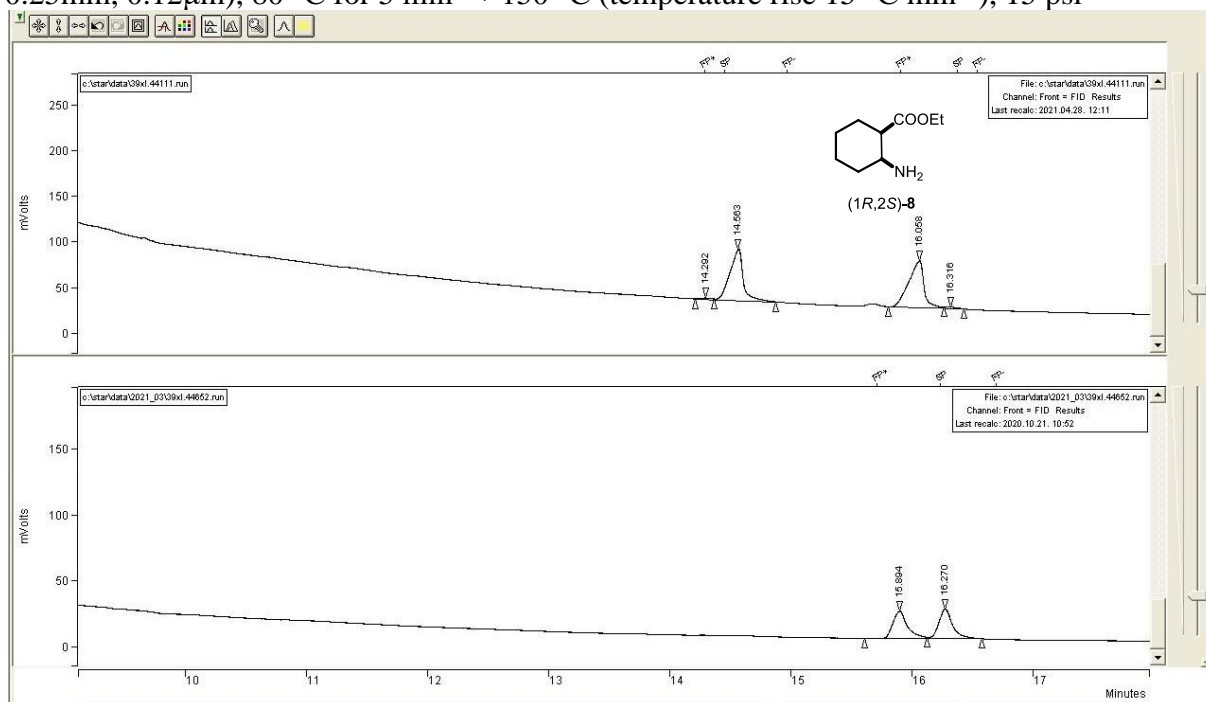

GC Chromatogram of ethyl-2-aminocycloheptanecarboxylate (**9**): retention times (min) for (1*R*,2*S*)-**9**: 40.975 (antipode: 41.865), GC equipped with a Chirasil-L-Val column (25m, 0.25mm, 0.12μm), 50 °C for 5 min → 140 °C (temperature rise 10 °C min<sup>-1</sup>), 10 psi

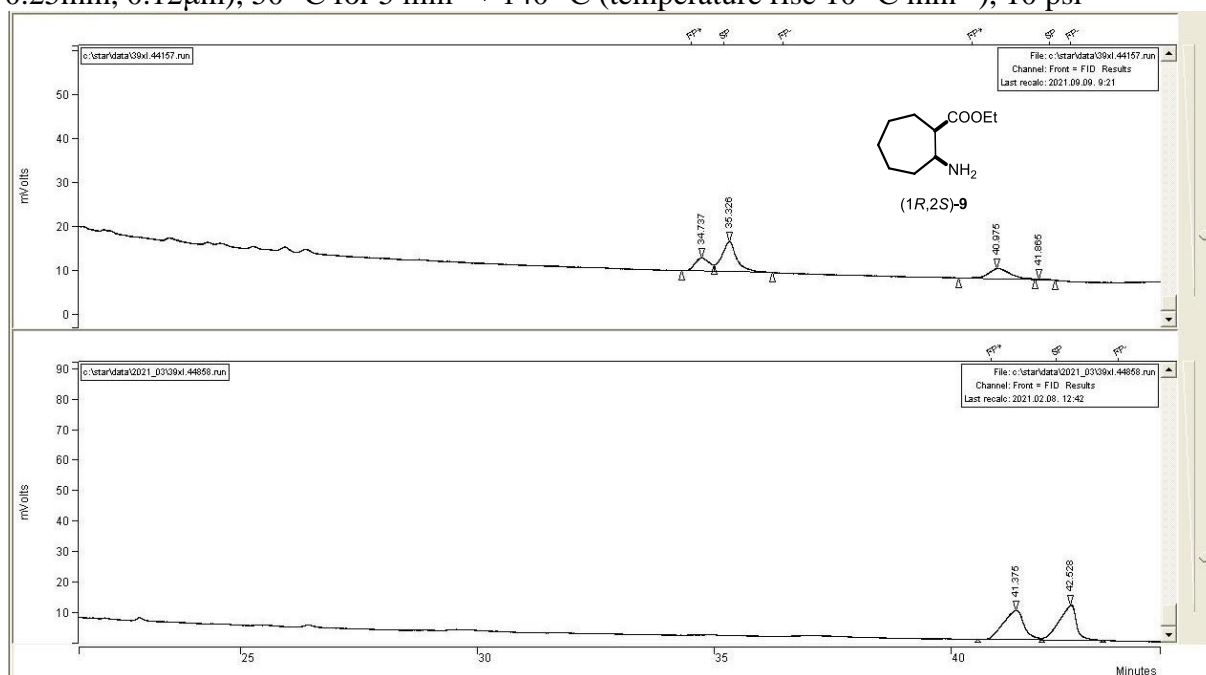

GC Chromatogram of ethyl-2-aminocyclooctanecarboxylate (**13**): retention times (min) for (1*R*,2*S*)-**13**: 57.405 (antipode: 59.240), GC equipped with a Chirasil-L-Val column (25m, 0.25mm, 0.12μm), 50 °C for 5 min → 140 °C (temperature rise 10 °C min<sup>-1</sup>), 10 psi

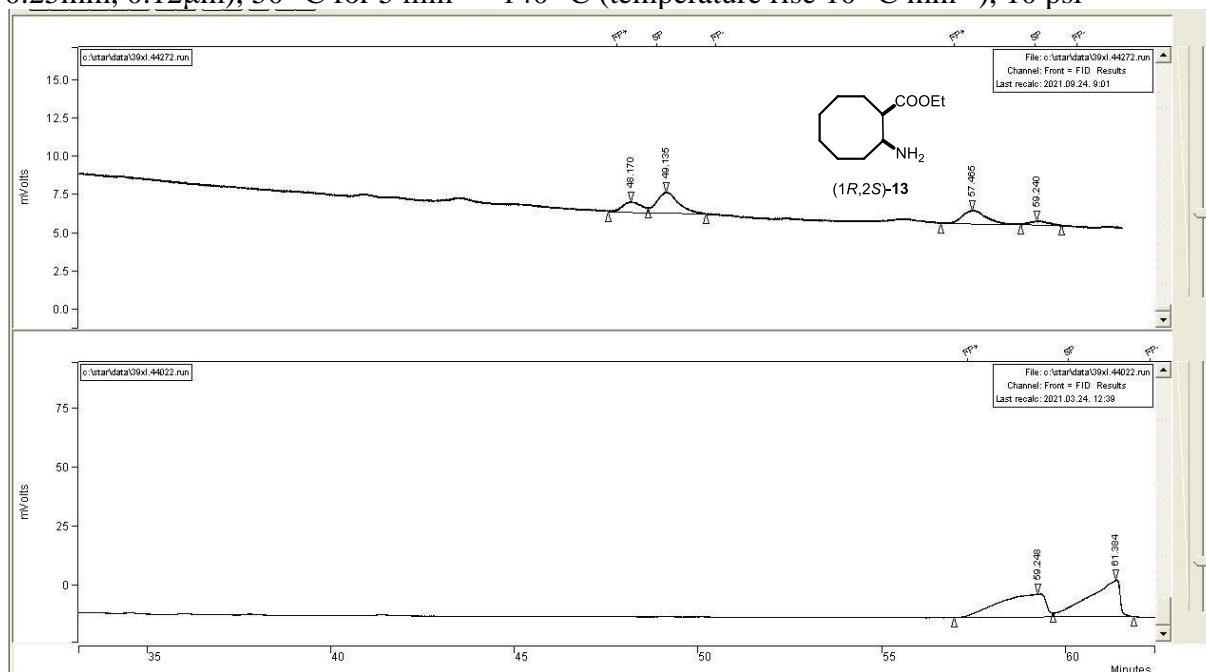

#### 4. GC Chromatograms of amino acid enantiomers 14-17:

GC Chromatograms of 2-aminocyclopentanecarboxylic acid (**14**): retention times (min) for (1*S*,2*R*)-**14**: 12.963 (antipode: 12.674), GC equipped with a Chirasil-L-Val column (25m, 0.25mm, 0.12μm), 80 °C for 5 min → 150 °C (temperature rise 15 °C min<sup>-1</sup>), 15 psi

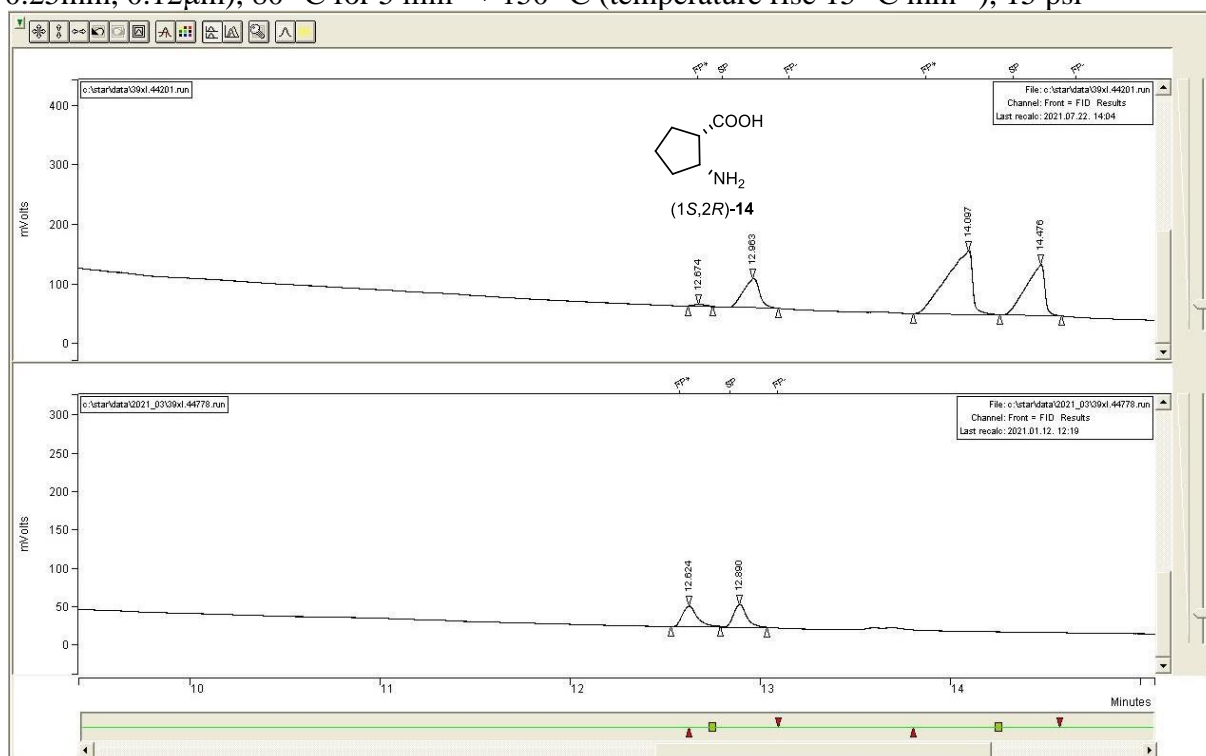

GC Chromatograms of 2-aminocyclohexanecarboxylic acid (**15**): retention times (min) for (1*S*,2*R*)-**15**: 14.563 (antipode: 14.292), GC equipped with a Chirasil-L-Val column (25m, 0.25mm, 0.12μm), 80 °C for 5 min → 150 °C (temperature rise 15 °C min<sup>-1</sup>), 15 psi

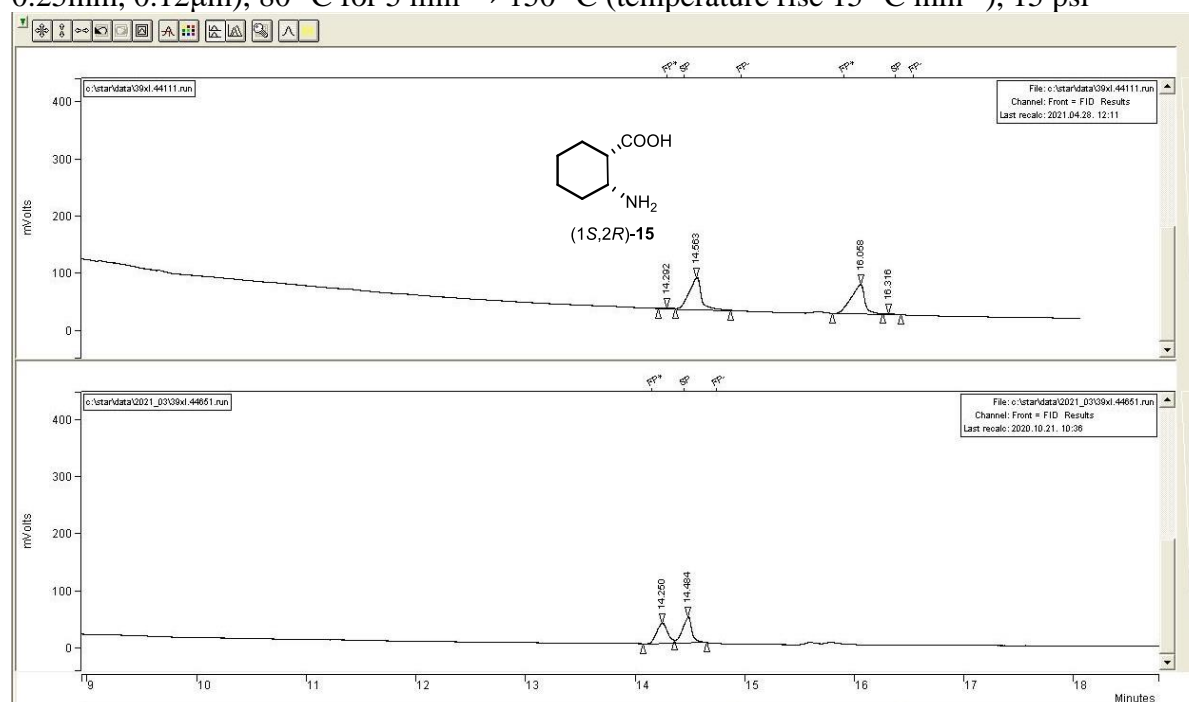

GC Chromatograms of 2-aminocycloheptanecarboxylic acid (**16**): retention times (min) for (1*S*,2*R*)-**16**: 35.641 (antipode: 34.869) GC equipped with a Chirasil-L-Val column (25m, 0.25mm, 0.12 $\mu$ m), 50 °C for 5 min  $\rightarrow$  140 °C (temperature rise 10 °C min<sup>-1</sup>), 10 psi

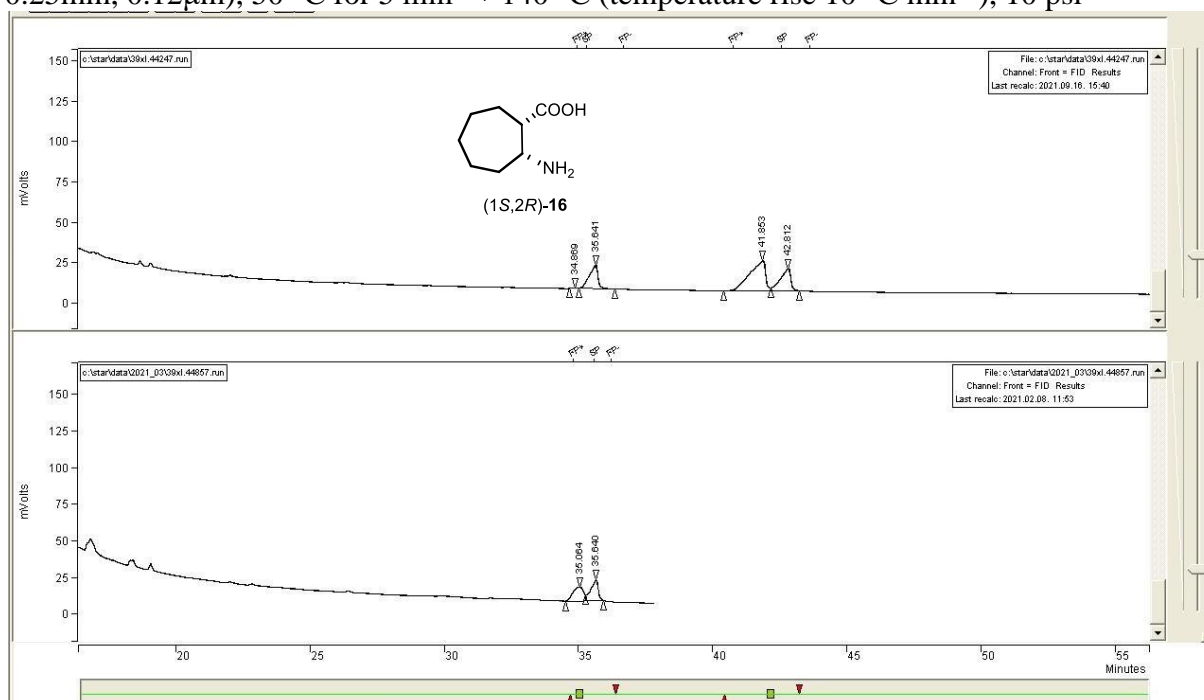

GC Chromatograms of 2-aminocyclooctanecarboxylic acid (**17**): retention times (min) for (1*S*,2*R*)-**17**: 49.309 (antipode: 48.819), GC equipped with a Chirasil-L-Val column (25m, 0.25mm, 0.12 $\mu$ m), 50 °C for 5 min  $\rightarrow$  140 °C (temperature rise 10 °C min<sup>-1</sup>), 10 psi

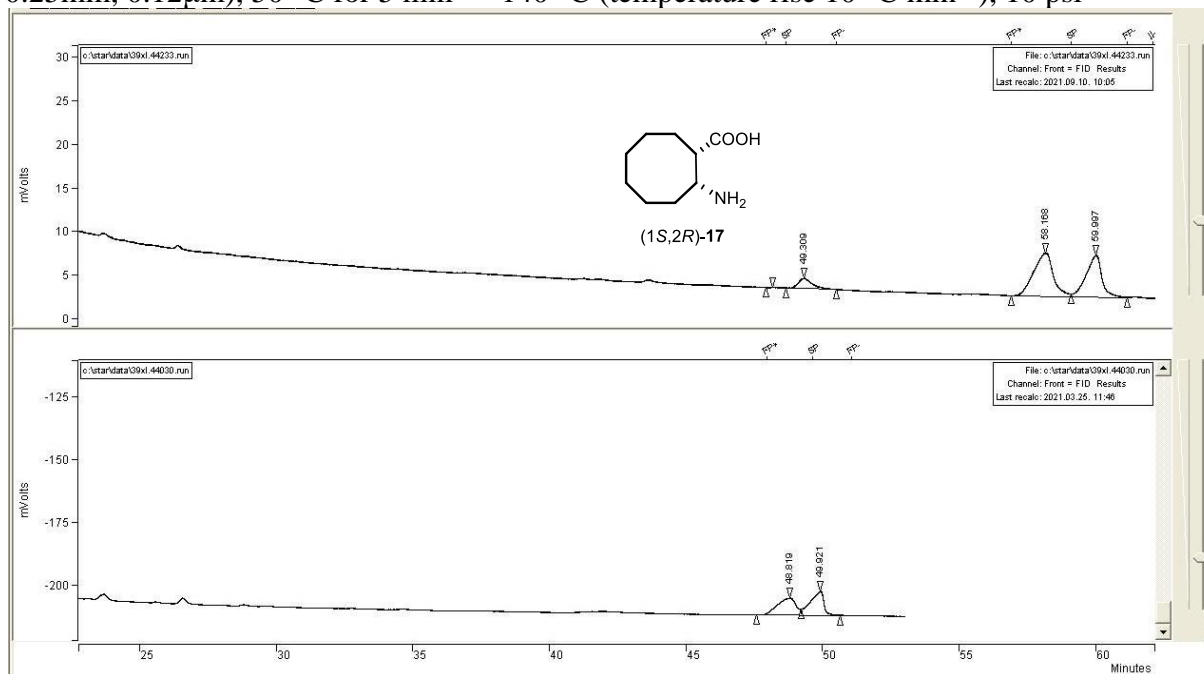

## 5. HRMS (ESI) spectra of ester enantiomers (1*R*,2*S*)-7-9 and (1*R*,2*S*)-13

HRMS spectrum of ethyl (1*R*,2*S*)-2-aminocyclopentanecarboxylate (**7**)

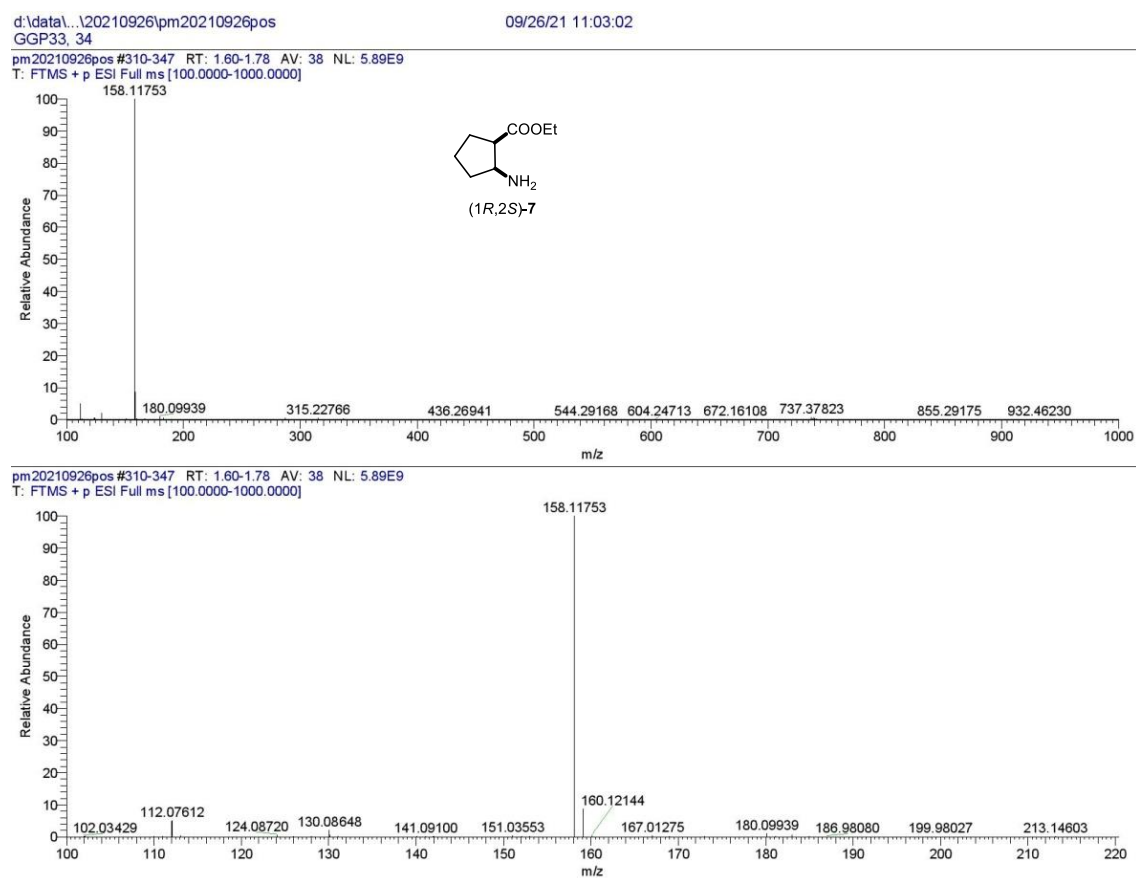

# HRMS spectrum of ethyl (1*R*,2*S*)-2-aminocyclohexanecarboxylate (**8**)

d:\data\...20210926\pm20210926pos  
GGP33\_34

09/26/21 11:03:02

pm20210926pos #925-962 RT: 4.74-4.92 AV: 38 NL: 5.52E9  
T: FTMS + p ESI Full ms [100.0000-1000.0000]

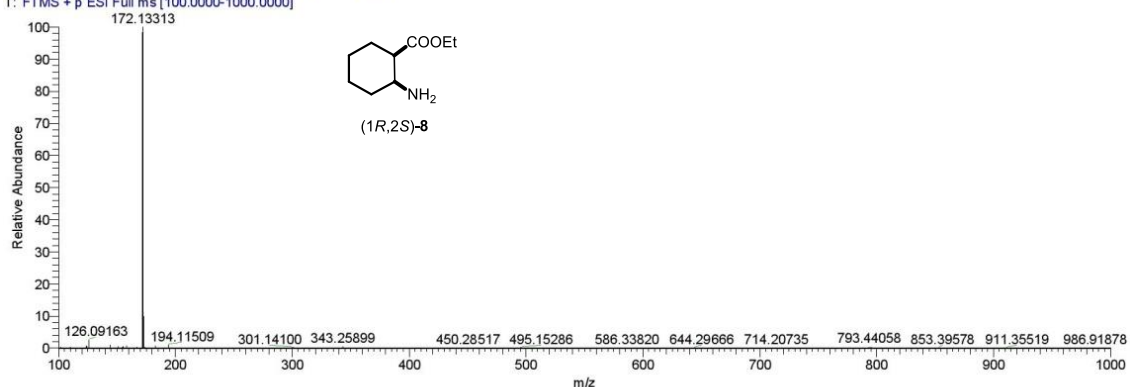

pm20210926pos #925-962 RT: 4.74-4.92 AV: 38 NL: 5.52E9  
T: FTMS + p ESI Full ms [100.0000-1000.0000]

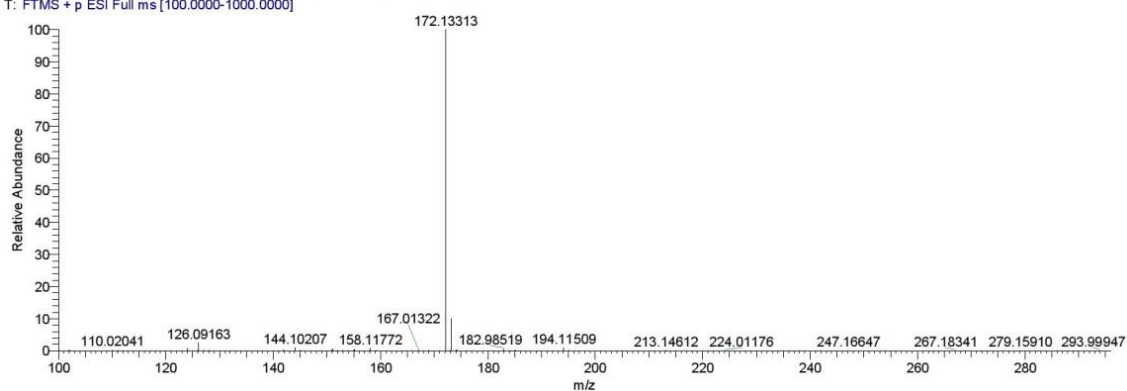

# HRMS spectrum of ethyl (1*R*,2*S*)-2-aminocycloheptanecarboxylate (**9**)

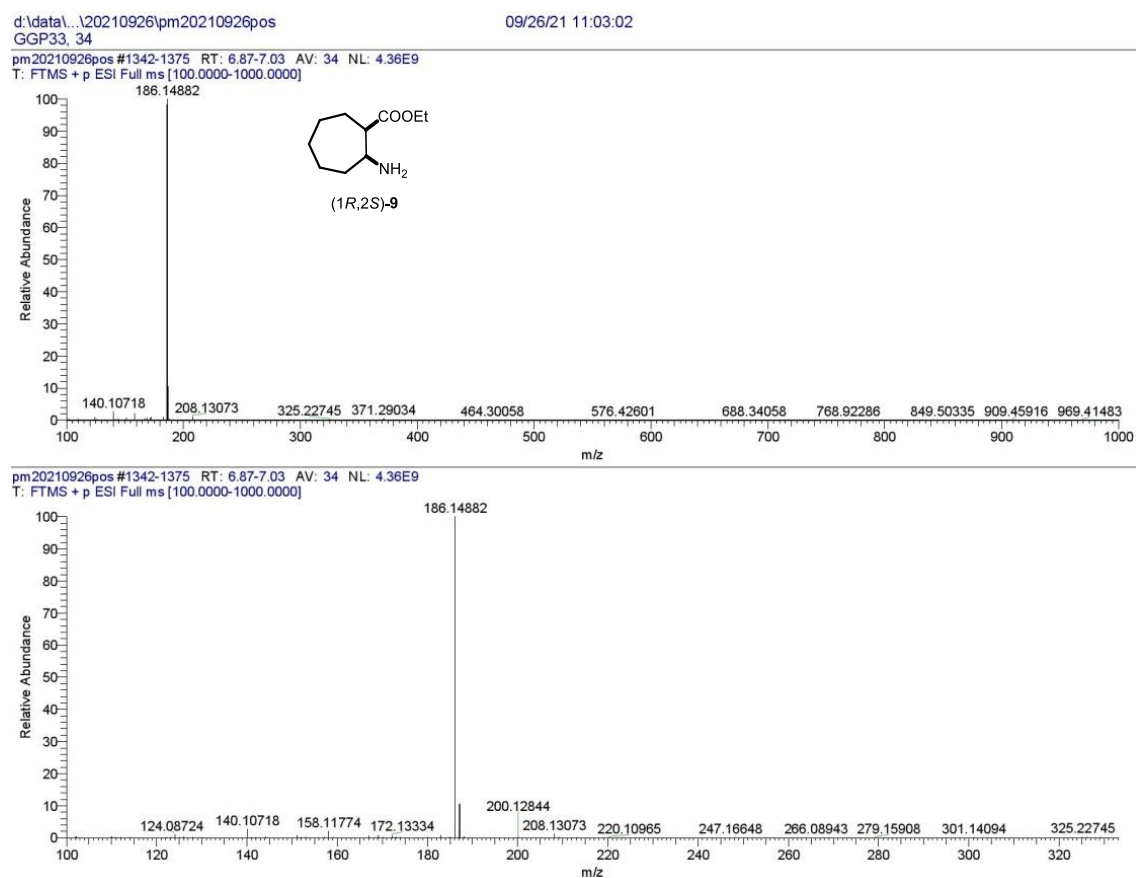



# HRMS spectrum of ethyl (1*R*,2*S*)-2-aminocyclooctanecarboxylate (**13**)

d:\data\...20210926\pm20210926pos  
GGP33\_34

09/26/21 11:03:02

pm20210926pos #1717-1750 RT: 8.78-8.95 AV: 34 NL: 4.17E9  
T: FTMS + p ESI Full ms [100.0000-1000.0000]

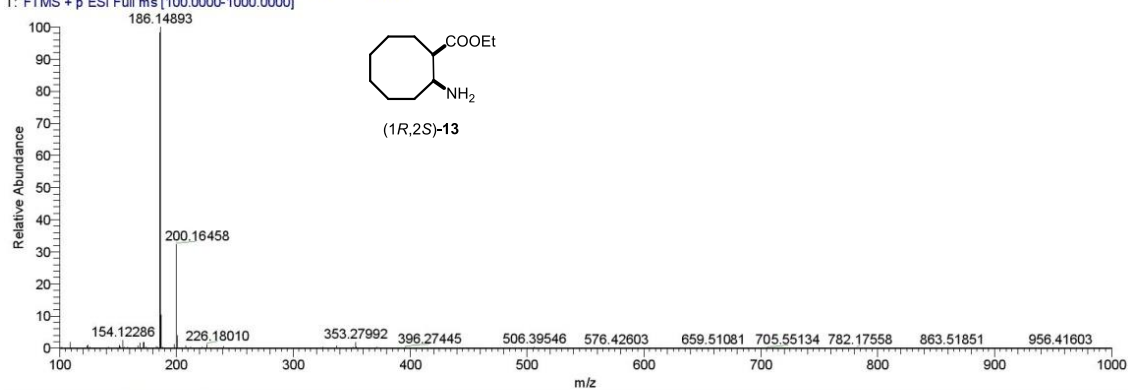

pm20210926pos #1717-1750 RT: 8.78-8.95 AV: 34 NL: 4.17E9  
T: FTMS + p ESI Full ms [100.0000-1000.0000]

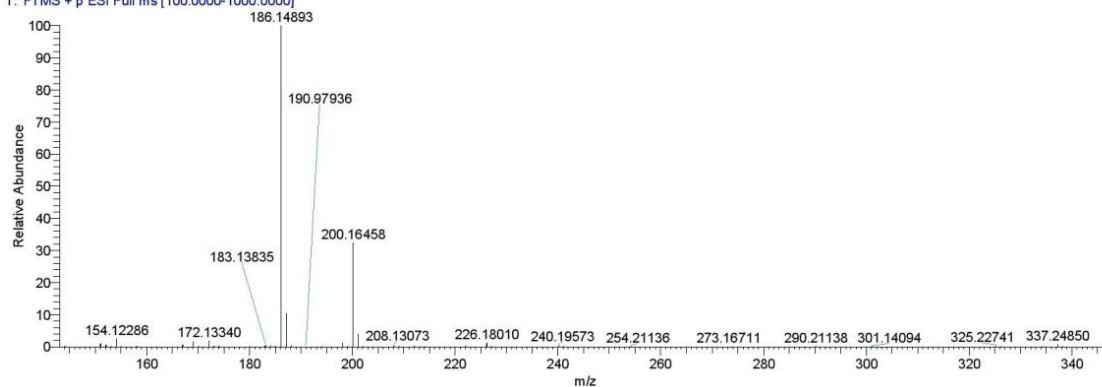

## 6. HRMS (ESI) spectra of amino acid enantiomers (1*S*,2*R*)-14-17

HRMS spectrum of (1*S*,2*R*)-2-aminocyclopentanecarboxylic acid (**14**)

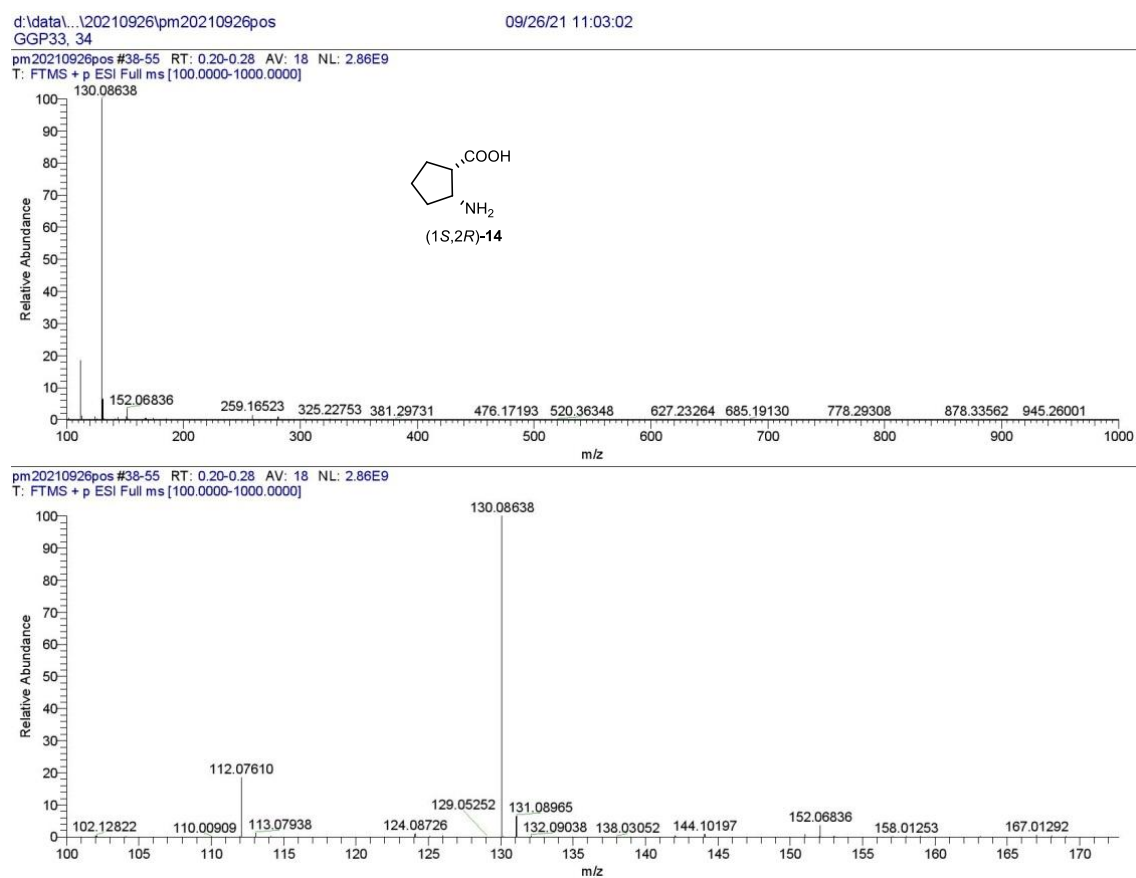

## HRMS spectrum of (1*S*,2*R*)-2-aminocyclohexanecarboxylic acid (**15**)

d:\data\... \20210926\pm20210926pos  
GGP33\_34

09/26/21 11:03:02

pm20210926pos #681-734 RT: 3.49-3.76 AV: 54 NL: 4.85E9  
T: FTMS + p ESI Full ms [100.0000-1000.0000]

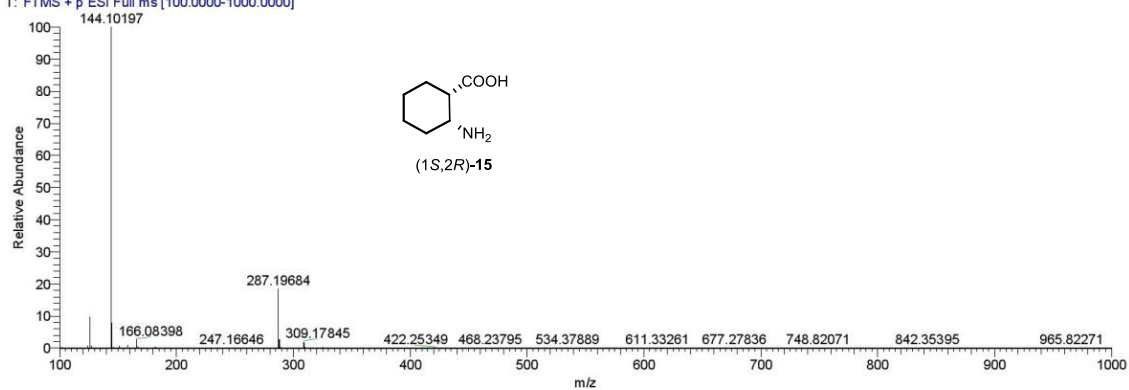

pm20210926pos #681-734 RT: 3.49-3.76 AV: 54 NL: 4.85E9  
T: FTMS + p ESI Full ms [100.0000-1000.0000]

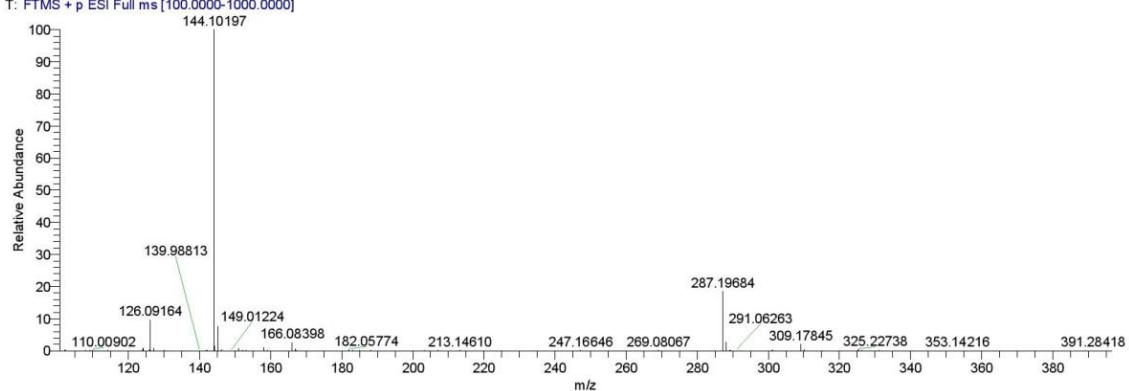

# HRMS spectrum of (1*S*,2*R*)-2-aminocycloheptanecarboxylic acid (**16**)

d:\data\... \20210926\pm20210926pos  
GGP33\_34

09/26/21 11:03:02

pm20210926pos #1143-1183 RT: 5.85-6.05 AV: 41 NL: 3.38E9  
T: FTMS + p ESI Full ms [100.0000-1000.0000]

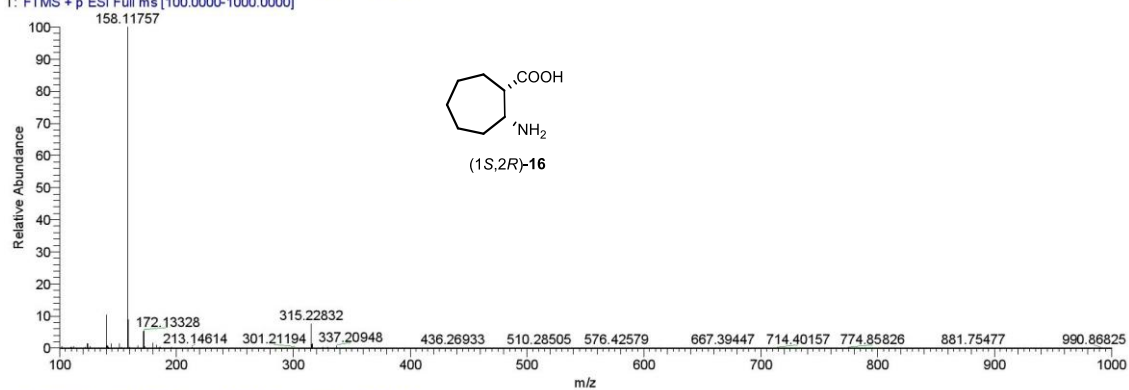

pm20210926pos #1143-1183 RT: 5.85-6.05 AV: 41 NL: 3.38E9  
T: FTMS + p ESI Full ms [100.0000-1000.0000]

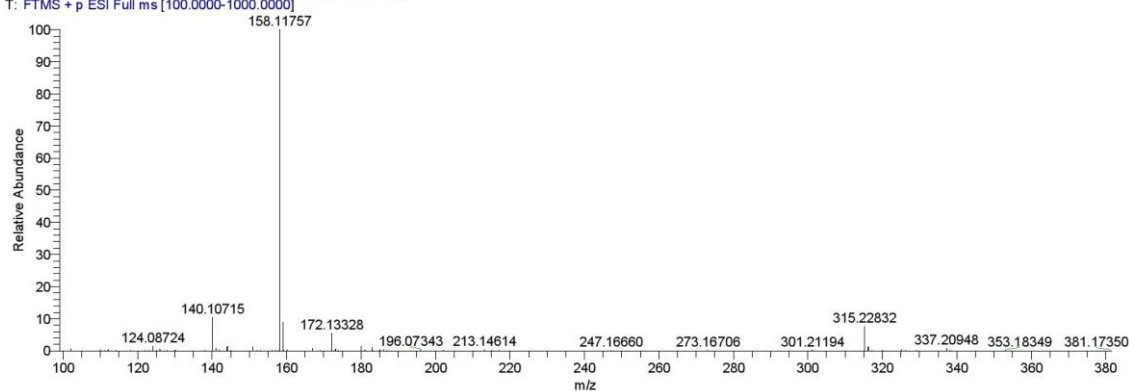

# HRMS spectrum of (1*S*,2*R*)-2-aminocyclooctanecarboxylic acid (**17**)

d:\data\... \20210926\pm20210926pos  
GGP33\_34

09/26/21 11:03:02

pm20210926pos #1548-1575 RT: 7.92-8.05 AV: 28 NL: 3.79E9  
T: FTMS + p ESI Full ms [100.0000-1000.0000]

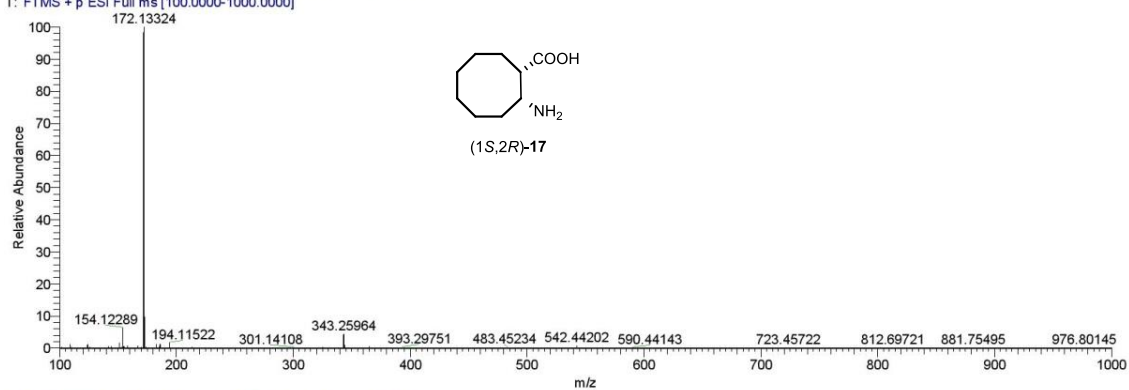

pm20210926pos #1548-1575 RT: 7.92-8.05 AV: 28 NL: 3.79E9  
T: FTMS + p ESI Full ms [100.0000-1000.0000]

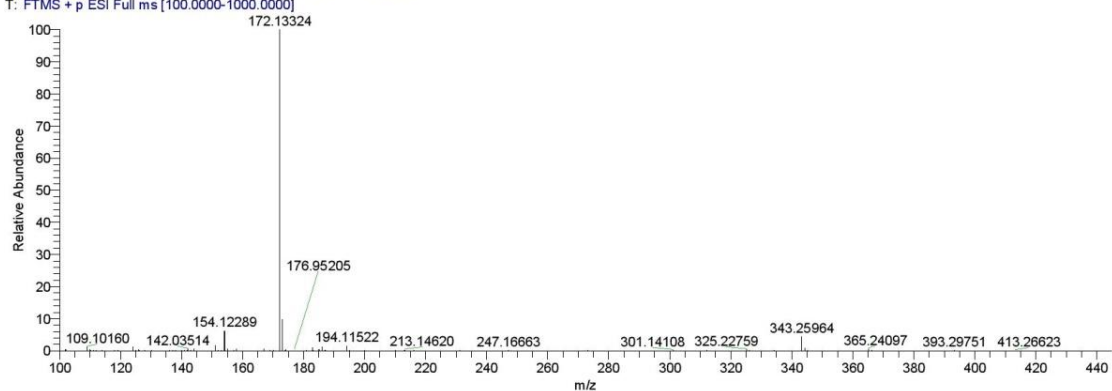

Supplement: s1 [file s1]
